# Supplementary material for: Protective Potential of an Autogenous Vaccine in an Aerogenous Model of Escherichia coli Infection in Broiler Breeders
Source: MDPI journal article supplement (doi:10.3390/vaccines9111233), 2021-10-22

## Necropsy sheet

|                    |                                                         |                      |                                                          |                          |                                        |              |           |
|--------------------|---------------------------------------------------------|----------------------|----------------------------------------------------------|--------------------------|----------------------------------------|--------------|-----------|
| <b>Farm:</b>       |                                                         | <b>Journal #</b>     |                                                          | <b>Hold #</b>            |                                        | <b>Date:</b> |           |
| <b>House:</b>      |                                                         | <b>ID #:</b>         |                                                          | <b>BW:</b>               | _____ kg                               | <b>Sex:</b>  | F___ M___ |
| <b>Species:</b>    | Poultry <input checked="" type="checkbox"/> Other _____ | <b>Breed:</b>        | Ross 308 <input checked="" type="checkbox"/> Other _____ | <b>Age:</b>              | _____ weeks _____ days                 |              |           |
| <b>Euthanasia:</b> | Yes _____ No _____                                      | <b>Date (death):</b> |                                                          | <b>Method:</b>           | Cervical dislocation _____ Other _____ |              |           |
| <b>Comments:</b>   |                                                         |                      |                                                          | <b>Name</b><br>(writer): |                                        |              |           |

In all organ systems, the presence of the following should be evaluated/considered as fit for individual organs: oedema / hyperaemia / haemorrhagic / exudate / ulceration / erosion / contents (e.g. intestinal) / hyperplasia / etc. If no gross pathology is observed: **normal, iab, NC** or “–“ should be put on record.

| Organ system/area:                   | Description and/or pathoanatomical diagnosis                                                                     |
|--------------------------------------|------------------------------------------------------------------------------------------------------------------|
| <b>Surface</b>                       |                                                                                                                  |
| Plumage                              | Normal / Ruffled / blood-smudged / naked areas                                                                   |
| Skin                                 | Intact / lesion(s) / laceration ( “hanetråd” y / n ) / dark coloration (head area)                               |
| Foot pads                            | Normal / discolouration: _____ mm / hyperkeratosis _____ mm /ulceration _____ mm / profundal swelling            |
| Natural orifices                     | NC / urate (peri-cloacal) / faecal / blood / other                                                               |
| Mucus membranes                      | Normal / dry / hyperaemia / ulceration / dark coloration / “smudged” / other                                     |
| Eyes, conjunctiva                    | Normal / hyperaemia / increased discharge / not possible to evaluate                                             |
| Other                                | Obs. cyanosis / cadaverosis (mild / pronounced )                                                                 |
| <b>Head and cranial<br/>“plucks”</b> |                                                                                                                  |
| Sinus infraorbitalis                 | Normal / hyperaemia / exudate (serous / mucopurulent / other )                                                   |
| Oral cavity                          | Normal / feed present / blood present / mucus present                                                            |
| Esophagus                            | NC / other                                                                                                       |
| Larynx                               | Normal / hyperaemia / petechiae / mucus / other                                                                  |
| Trachea<br>Lumen                     | Normal / hyperaemia / haemorrhagic / mucopurulent / fibrinopurulent / catarrhalic / mucus / blood coagel / other |
| Sampled: <input type="checkbox"/>    |                                                                                                                  |

|                                              |                                                                                                                                                                                                                                                                                         |
|----------------------------------------------|-----------------------------------------------------------------------------------------------------------------------------------------------------------------------------------------------------------------------------------------------------------------------------------------|
| <i>Ingluvies (crop)</i><br><i>Other</i>      | <i>Empty / content present / filled / extended</i><br><br><br><br>                                                                                                                                                                                                                      |
| <b>Corpus</b><br><i>Body condition score</i> | <i>Cachectic / below average / normal / above average / obese</i><br><br>                                                                                                                                                                                                               |
| <i>Hydration</i>                             | <i>Normal / dehydrated (slightly / severely)</i><br><br>                                                                                                                                                                                                                                |
| <i>Subcutis</i>                              | <i>Normal / bursitis pre-sternalis (acute / chronic) / oedema / hyperaemia / dark coloration</i><br><br>                                                                                                                                                                                |
| <i>Muscles</i>                               | <i>Normal / petechiae / ecchymoses / dark coloration / other</i><br><br>                                                                                                                                                                                                                |
|                                              | <i>DPM necrosis present (sin. / dext. / bilateral) / absent</i><br><i>Fascial reaction present (oedema / fibrosis / haemorrhage) / absent</i><br><br>                                                                                                                                   |
| <i>Articulatio</i>                           | <i>Art. coxae: NC / FHN (head/cartilage/collum) / other</i><br><br><i>Art. genus: NC / other</i><br><i>Bonemarrow sampled: <input type="checkbox"/></i>                                                                                                                                 |
| <i>Other</i>                                 | <i>Art. intertarsalis: NC / increased synovial fluid / other</i><br><br><br>                                                                                                                                                                                                            |
| <b>Coelomic cavity</b><br><b>“Abdomen”</b>   |                                                                                                                                                                                                                                                                                         |
| <i>Sternum</i>                               | <i>Normal / fractured (# gross fractures) Cartilage mm</i><br><br>                                                                                                                                                                                                                      |
| <i>Peritoneum</i>                            | <i>NC (transparent) / milky / hyperaemia / exudate (diffuse / focally) (fibrinopurulent / serous / other) Sampled: <input type="checkbox"/></i><br><br>                                                                                                                                 |
| <i>Liver</i>                                 | <i>NC / light colour / obs. steatosis / fragile / enlarged / necrosis / perihepatitis (fibrinopurulent / fibrinous) / increased texture / other Sampled: <input type="checkbox"/></i><br><br>                                                                                           |
| <i>Spleen</i>                                | <i>Normal / proliferated (white pulpa pronounced) / enlarged / distended / flaccid / other Sampled: <input type="checkbox"/></i><br><br>                                                                                                                                                |
| <i>Gastrointestinal tract</i>                | <i>Intestinum tenue: NC / Intestinum crassum: NC /</i><br><i>Caeca: NC / Proventriculus: NC /</i><br><i>Ventriculus: NC /</i><br><br>                                                                                                                                                   |
| <i>Follicles</i>                             | <i>In-lay: yes / no Developing egg present / fully developed egg present</i><br><i>Mesovarium Sampled: <input type="checkbox"/></i><br><br><i>Juvenile / active follicles / flaccid (atretic) follicles / ovarian regression / hyperaemia / inactive / oophoritis (fibrinopurulent)</i> |

|                   |                                                                                                                                               |
|-------------------|-----------------------------------------------------------------------------------------------------------------------------------------------|
| Salpinx           | Juvenile / active (size) / oedema / hyperaemia / exudate / congested / inactive / pale / atrophic / other                                     |
| Infundibulum      |                                                                                                                                               |
| Magnum            | Sampled: <input type="checkbox"/>                                                                                                             |
| Isthmus           |                                                                                                                                               |
| Uterus            |                                                                                                                                               |
| Right oviduct     | Cyst / Reminiscence                                                                                                                           |
| Kidneys           | Normal / swollen / increased tubular pattern / pale / other                                                                                   |
| “Thorax”          |                                                                                                                                               |
| Pericardium       | Normal (transparent) / opaque / exudate (fibrinopurulent / fibrinous) / other                                                                 |
| Pericardial fat   | Normal / petechiae / hyperaemia                                                                                                               |
| Heart muscle      | NC / epicardial oedema / epicardial congestion / other                                                                                        |
| Lungs             | Normal / congested ( ≤ 25% / ≈ 50% / ≥ 75% ) / pulmonary oedema (oozing) / (Suspected hypostasis) / other Sampled: <input type="checkbox"/>   |
| Saccus pneumatici | Normal (transparent) / opaque / exudate / thickened / hyperaemia / aerosacculitis (fibrinopurulent) / other Sampled: <input type="checkbox"/> |
| Other             |                                                                                                                                               |

| Other samples/registrations |  |
|-----------------------------|--|
| Pictures, measurements etc. |  |
|                             |  |
|                             |  |
|                             |  |
|                             |  |
|                             |  |
|                             |  |

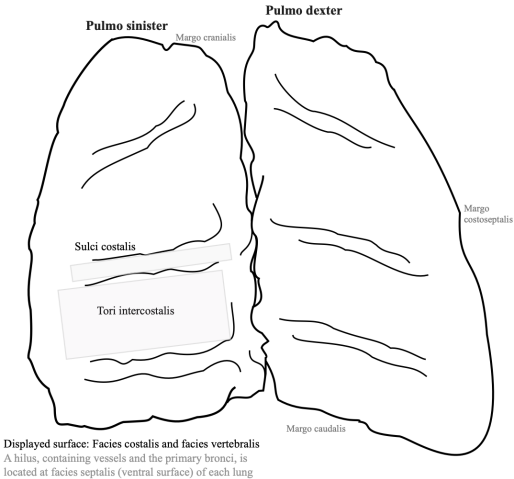

Supplement: s1 [file s1]
